# Supplementary material for: Inhibitory effect of SO2 on side reactions of NH3-SCR over olivine
Source: Royal Society of Chemistry journal article supplement (doi:10.1039/c4cy01683a), 2015-01-01
Supplement: c4cy01683a1.pdf [file c4cy01683a1.pdf]

1 **Supporting information:**

2 **Fig. S1.** The TGA and DSC studies (a) and FTIR spectrum analysis of exit gas from  
3 the natural olivine calcination (b).

4 **Fig. S2.** Scanning electron microscopy images of the natural olivine and the calcined  
5 olivine

6

7

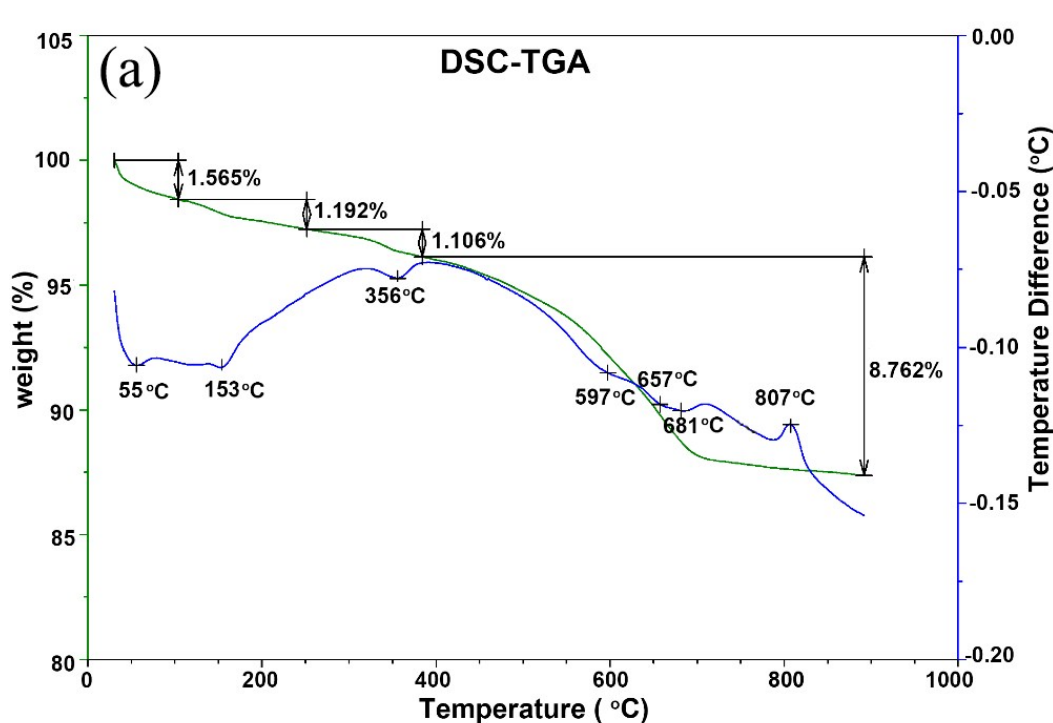

8

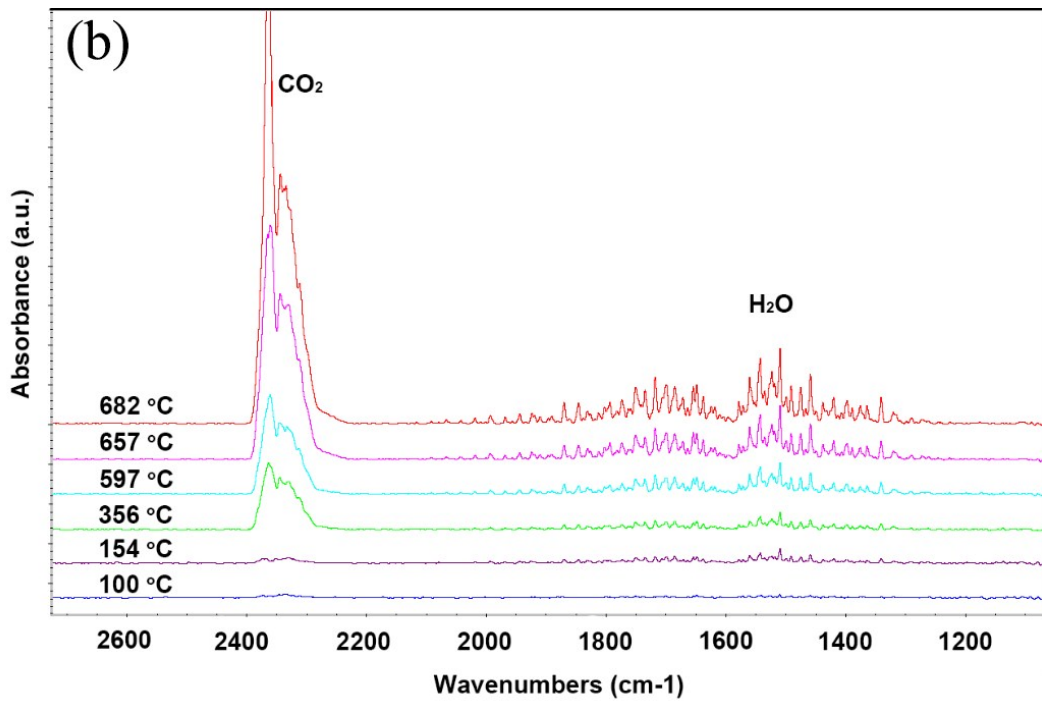

9

10

11

Fig. S1.

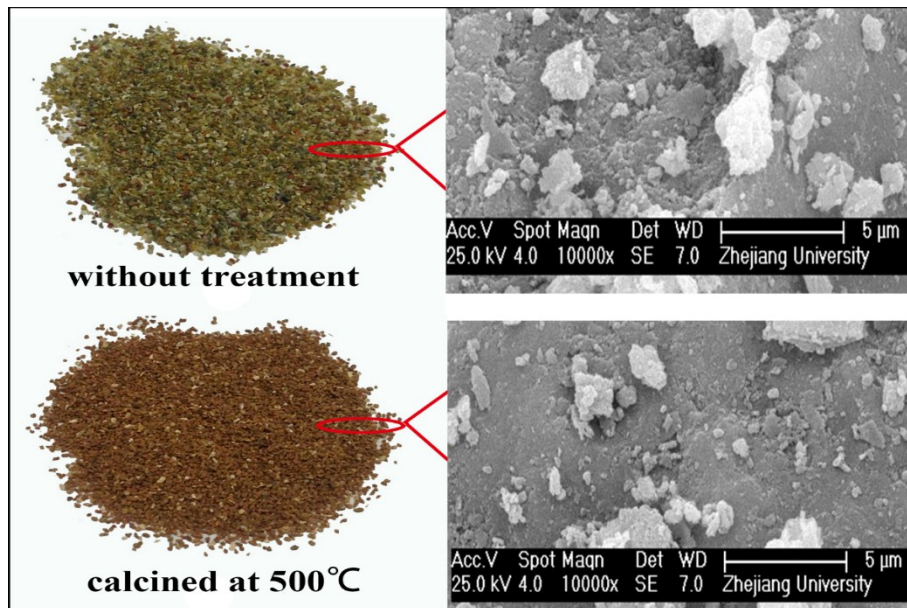

12

13

14

15

Fig. S2.
